# Supplementary material
Source: Springer Nature journal article supplement (https://www.springermedizin.de/resource/supplementary/12916_2010_281_MOESM4_ESM.pdf/9599544)
Supplement: MOESM4 [file 9599544]

## Delitto Treatment Based Classification

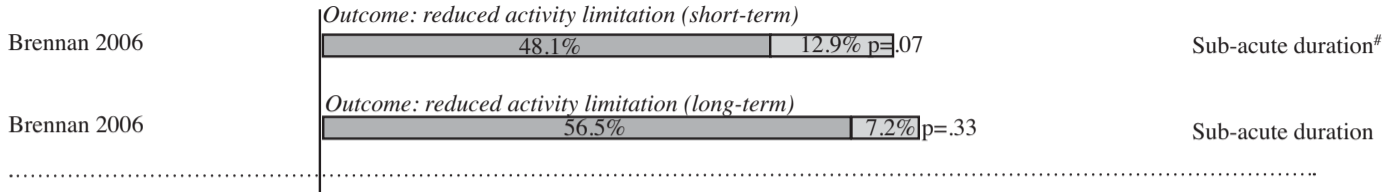

## McKenzie directional preference-based exercises

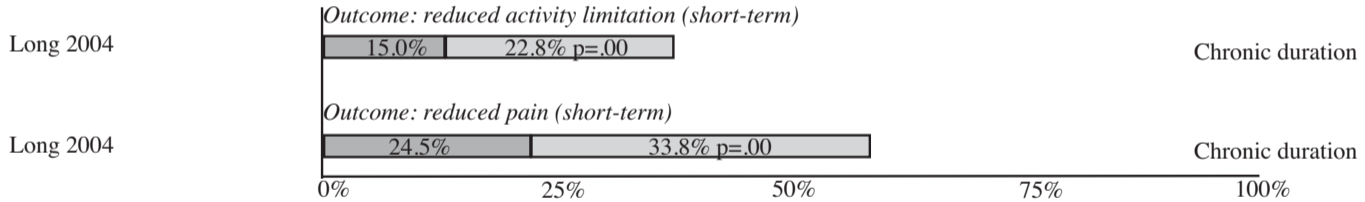

**Legend:**

 The proportion of additional improvement attributable to treatment matched to the prediction rule.

 The proportion of improvement attributable to other reasons (natural history, non-specific treatment effects and the likely improvement had this group received the comparison treatment).

The p value is the alpha level for the mean additional effect of the matched treatment (from Table 6).
